# Supplementary material for: Exciton manipulation in rippled transition metal dichalcogenides
Source: Royal Society of Chemistry journal article supplement (doi:10.1039/d0nr05602b), 2020-01-01
Supplement: d0nr05602b1.pdf [file d0nr05602b1.pdf]

## Supporting Information:

# Exciton Manipulation in Rippled Transition Metal Dichalcogenide

*Chen Long<sup>†</sup>, Hao Jin<sup>\*‡</sup>, Jianwei Li<sup>‡</sup>, and Ying Dai<sup>\*†</sup>*

<sup>†</sup>School of Physics, State Key Laboratory of Crystal Materials, Shandong University, 250100 Jinan, P. R. China.

<sup>‡</sup>Shenzhen Key Laboratory of Advanced Thin Films and Applications, College of Physics and Energy, Shenzhen University, 518060 Shenzhen, P. R. China.

\*E-mail: [jh@szu.edu.cn](mailto:jh@szu.edu.cn) (H. J); [daiy60@sdu.edu.cn](mailto:daiy60@sdu.edu.cn) (Y. D)

## 1. The optical absorption spectrum

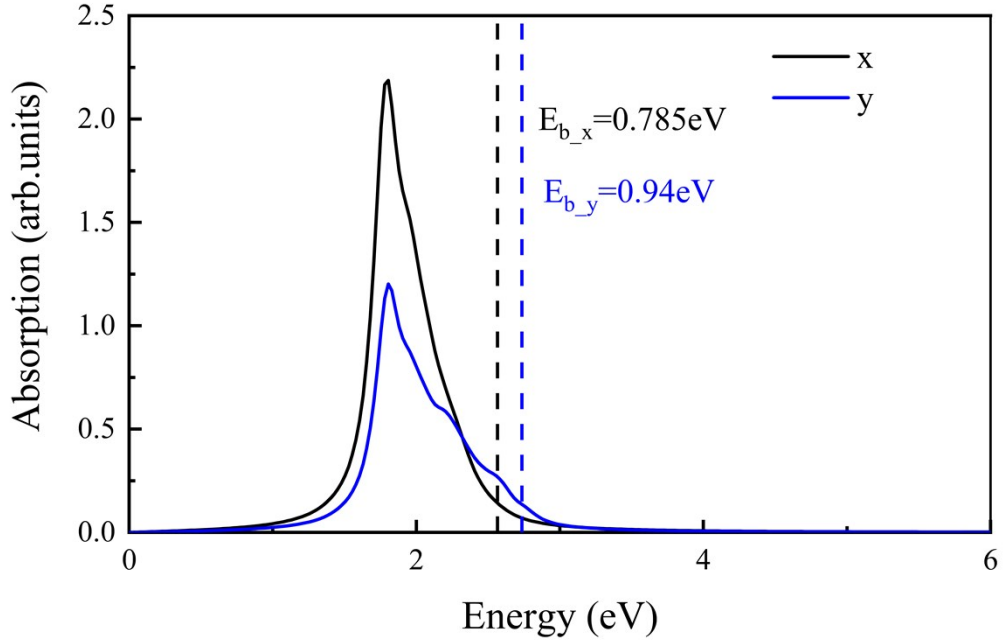

**Figure S1.** The calculated dielectric functions  $\epsilon_2$  for x-polarized (black solid line) and y-polarized (blue solid line) in SC-10. The GW bandgaps for first bright excitations are marked with vertical dash lines.

## 2. The effect of local strain on rippled MoS<sub>2</sub>

As shown in **Table 1**, under the same compressive stress, the change of direct band gap is smaller in rippled MoS<sub>2</sub> monolayer compared to that in rippled MoSSe monolayer. After band folding, the K point of monolayer structure is folded to the 2/3 along  $\Gamma$ -X path (namely K' point) in rippled structure. As demonstrated in **Fig. 2**, the position of direct band gap is still kept at K' point in rippled MoS<sub>2</sub>. In addition, similar to the case of flat MoS<sub>2</sub>, the bright-to-dark transition is not observed in rippled MoS<sub>2</sub>. The contribution of the first bright exciton in rippled MoS<sub>2</sub> is by the transition from the VBM to CBM at K' point, which is also the same as that in flat MoS<sub>2</sub>. While for rippled MoSSe, the situation is quite different. The position of direct band gap no longer locates at K' point (namely A point as shown in **Fig. 2** of the manuscript) and varies with the variation of local strain. From the above, we come to the conclusion that non-uniform strain has less impact on rippled MoS<sub>2</sub> not only on electronic properties but also on optical properties.

## 3. The real-space distribution of excitation

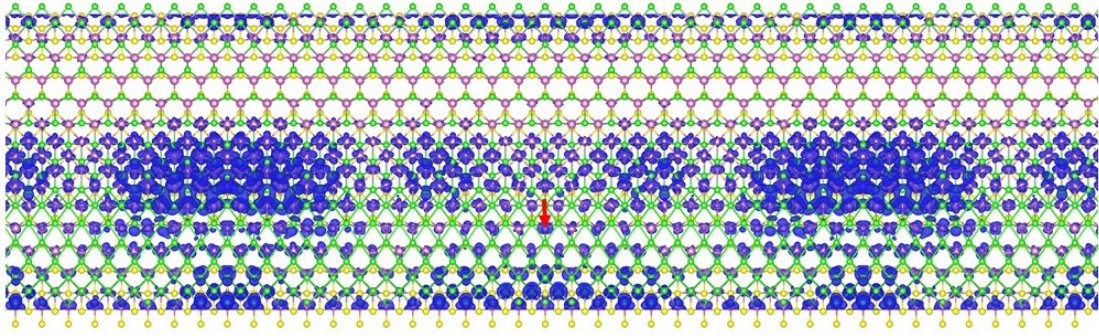

**Figure S2.** The Top views of real-space distribution of  $X_1$  for  $y$ -polarized light in SC-10. The fixed hole position is indicated by red arrow.

#### 4. The partial charge densities at CBM

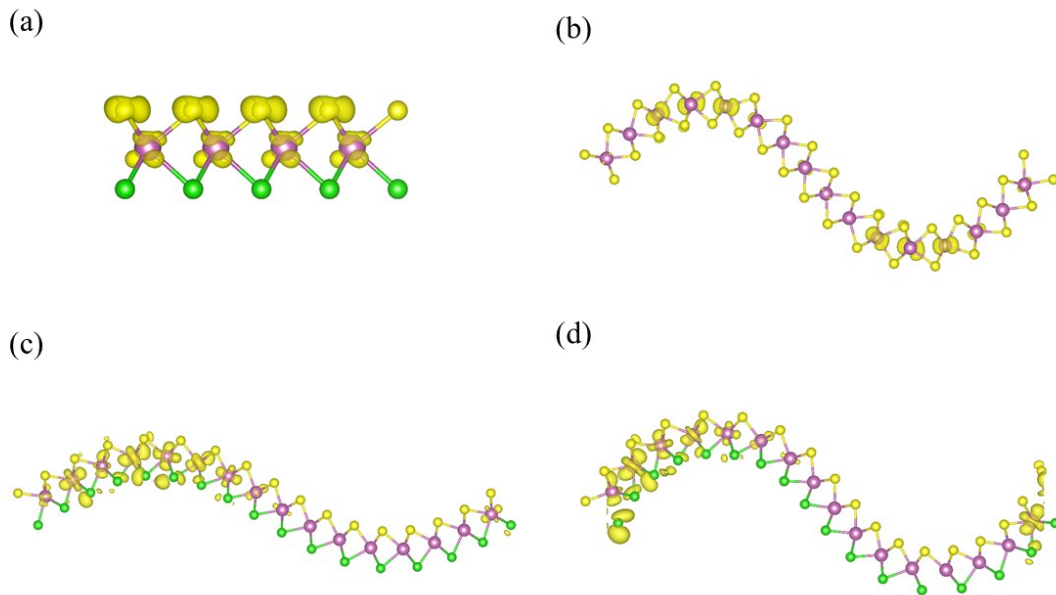

**Figure S3.** Top views of partial charge densities of (a) flat Janus-MoSSe, (b) rippled MoS<sub>2</sub>, (c) SC-15, and (d) SC-10 for CBM at the  $k$ -points where make a major contribution to  $X_1$  exciton.

#### 5. The schematic diagram of $X_0$ and $X_1$ excitons of rippled MoSSe

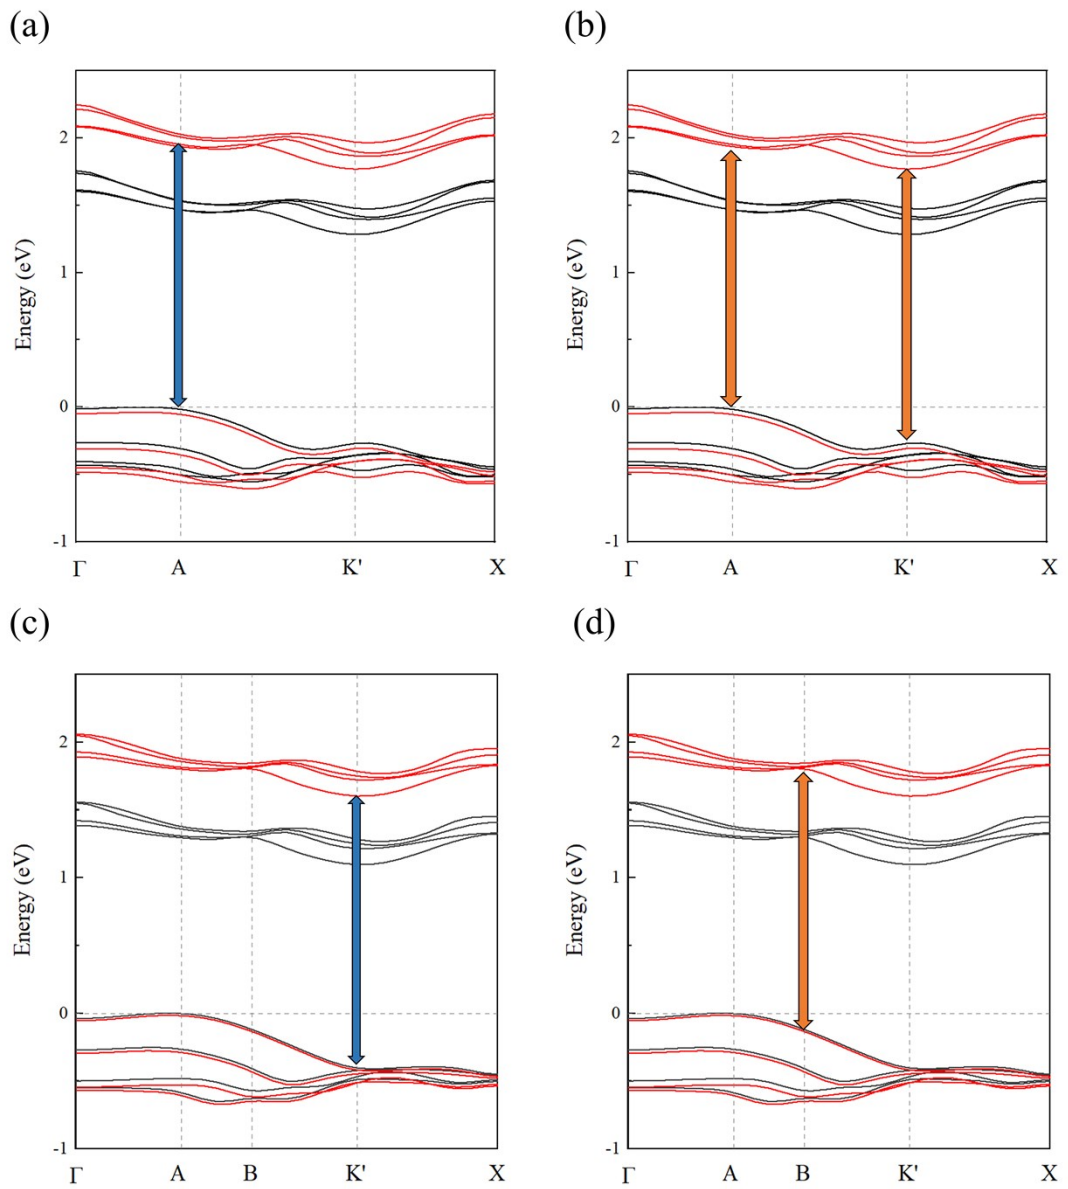

**Figure S4.** The schematic diagram of the contribution for (a)  $X_0$  exciton and (b)  $X_1$  exciton of SC-15 as well as (c)  $X_0$  exciton and (d)  $X_1$  exciton of SC-10. The blue and orange arrow point out the location where the transition takes place.
